# Supplementary material
Source: PubMed Central journal article supplement (PMC3447077)
Supplement: supp_111697_diff-newton-1-at.pdf [file supp_111697_diff-newton-1-at.pdf]

**Appendix 1 (as supplied by the authors):** ED mental health visit frequencies and age- and sex-adjusted DSVRs per 100,000 Alberta children by fiscal year and by First Nations and socio-economic status.

| Fiscal year | All          | First Nations | Welfare        | Government-sponsored program subsidy | No subsidy   |
|-------------|--------------|---------------|----------------|--------------------------------------|--------------|
| 2002/2003   |              |               |                |                                      |              |
| Count       | 4,865        | 581           | 333            | 830                                  | 3121         |
| DSVR (SE)   | 628.4 (11.6) | 1368.0 (72.3) | 1684.7 (132.4) | 978.1 (48.7)                         | 497.6 (11.0) |
| 95%CI       | 605.7–651.1  | 1226.2–1509.7 | 1425.1–1944.2  | 882.7–1073.5                         | 476.1–519.1  |
| 2003/2004   |              |               |                |                                      |              |
| Count       | 4917         | 627           | 300            | 911                                  | 3079         |
| DSVR (SE)   | 634.3 (12.9) | 1447.9 (74.2) | 1443.5 (106.4) | 991.5 (67.8)                         | 497.2 (11.0) |
| 95%CI       | 609.0–659.7  | 1302.4–1593.4 | 1235.0–1651.9  | 858.6–1124.5                         | 475.7–518.8  |
| 2004/2005   |              |               |                |                                      |              |
| Count       | 5105         | 725           | 310            | 896                                  | 3174         |
| DSVR (SE)   | 654.6 (11.6) | 1619.2 (78.4) | 1478.1 (103.6) | 927.4 (41.3)                         | 513.7 (11.3) |
| 95%CI       | 631.9–677.3  | 1465.4–1772.9 | 1275.0–1681.1  | 846.5–1008.2                         | 491.5–535.9  |
| 2005/2006   |              |               |                |                                      |              |
| Count       | 5274         | 740           | 316            | 996                                  | 3222         |
| DSVR (SE)   | 670.0 (12.1) | 1627.3 (74.7) | 1606.3 (133.0) | 1010.5 (47.3)                        | 516.6 (11.3) |
| 95%CI       | 646.4–693.7  | 1480.9–1773.6 | 1345.6–1867.0  | 917.7–1103.2                         | 494.4–538.8  |
| 2006/2007   |              |               |                |                                      |              |
| Count       | 5287         | 791           | 342            | 1018                                 | 3136         |
| DSVR (SE)   | 663.6 (12.1) | 1714.9 (92.3) | 1716.6 (121.9) | 868.6 (35.4)                         | 510.9 (11.7) |
| 95%CI       | 639.9–687.4  | 1534.1–1895.7 | 1477.8–1955.5  | 799.2–938.0                          | 487.9–533.9  |
| 2007/2008   |              |               |                |                                      |              |
| Count       | 5208         | 766           | 371            | 1088                                 | 2983         |
| DSVR (SE)   | 654.9 (11.7) | 1664.0 (74.9) | 1755.2 (117.2) | 992.9 (41.6)                         | 481.4 (11.2) |
| 95%CI       | 631.9–677.8  | 1517.2–1810.9 | 1525.5–1985.0  | 911.5–1074.4                         | 459.6–503.3  |

CI = confidence interval; DSVR = directly standardized visit rates; ED = emergency department; SE = standard error.
